# Supplementary material for: Alternative Devices for Heart Rate Variability Measures: A Comparative Test–Retest Reliability Study
Source: MDPI journal article supplement (doi:10.3390/bs11050068), 2021-05-02
Supplement: s1 [file s1]

**Supplement Killian, et al.**

**Alternative devices for heart rate variability measures: a comparative test-retest reliability study**

**Appendix**

Determination of the Minimal Clinically Important Difference using a Global Rating Scale as a clinical anchor

**Figures**

Figure 1. Standard deviation of RR values for four devices in five behavioral conditions (SDNN)

Figure 2. Root mean square of successive difference values for four devices in five behavioral conditions (RMSSD)

Figure 3. Standard deviation of instantaneous heart values for four devices in five behavioral conditions (STD HR)

Figure 4. Mean heart rate values for four devices in five behavioral conditions (Mean HR)

Figure 5. Low frequency to high frequency ratio values for four devices in five behavioral conditions (LF/HF)

**Tables**

Table 1. Operational reliability of the four devices

Table 2. Numerical values of HRV measures

Table 3. Minimal detectable differences with confidence intervals (Detailed Specification)

Table 4. Intraclass correlation coefficients

Table 5. Standard error of measurement

Table 6. Bland-Altman limits of agreement (Detailed Specification)



**Determination of the Minimal Clinically Important Difference using a Global Rating Scale as a clinical anchor**

- A. A measure of heart rate variability is obtained before and after treatment.
- B. A GRS assessment is obtained from each patient after treatment to determine the patient's perception of clinical change. A commonly used GRS is a 15-point scale where -7="Much Worse", 0="No Change" and +7="Much Better".
- C. Declare a 3-point change on the GRS ("Somewhat Better" or "Somewhat Worse") to be the minimal clinically important difference.
- D. Use the 3-point change criterion to identify the subset of "minimal changers" within the patient population and determine the change in the HRV measure for each minimal changer.
- E. The Minimal Clinically Important Difference is the average change (absolute value) observed in the minimal changer subpopulation.

Setting the minimal change criterion to three points on the GRS is a matter of clinical judgment. If the change criterion is increased, for example to five ("Quite a Bit Better" and "Quite a Bit Worse"), the Minimal Clinically Important Difference will increase. In addition to the Global Rating Scale, which is an subjective anchor, possible objective anchors include medication use and health care system utilization. Variants of anchor-based methods include within-patient score change, between-patients score change, sensitivity and specificity-based designs and social comparison designs [29].



**Figure 1. SDNN**

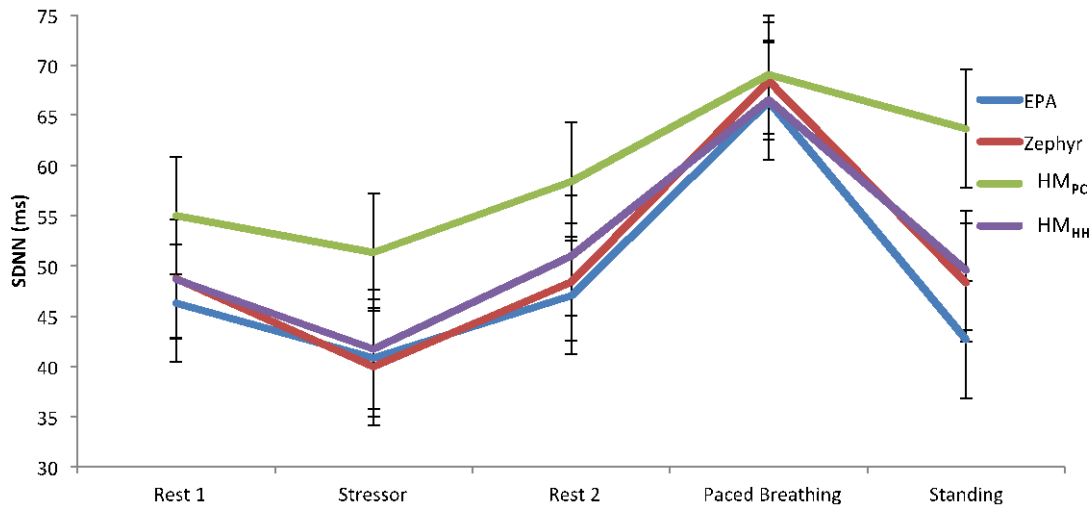

**Figure 1. Standard Deviation of RR values (SDNN):** (a) When aggregating data across both sessions, there was a main effect of segment, indicating a general decrease in SDNN from initial rest, in response to the stressor, followed by a general increase during the recovery portion of the paradigm and then a slight decrease in SDNN during the standing segment ( $F=26.02$ ,  $p<.001$ ); (b) There appeared to be a main effect of device, such that HMPc tended to display greater SDNN values compared to all other devices ( $F=9.32$ ,  $p<.001$ ), with post-hoc analyses revealing higher SDNN value at standing for the HMPc device compared to the EPA6 device; and (c) when examining the interaction between device and segment all 4 devices tended to vary in a similar pattern throughout the session ( $F=0.75$ ,  $p=.70$ ). Data from a linear mixed model with two fixed factors (device, segment) and a random subject effect to calculate the difference between devices and between sessions.



**Figure 2. RMSSD**

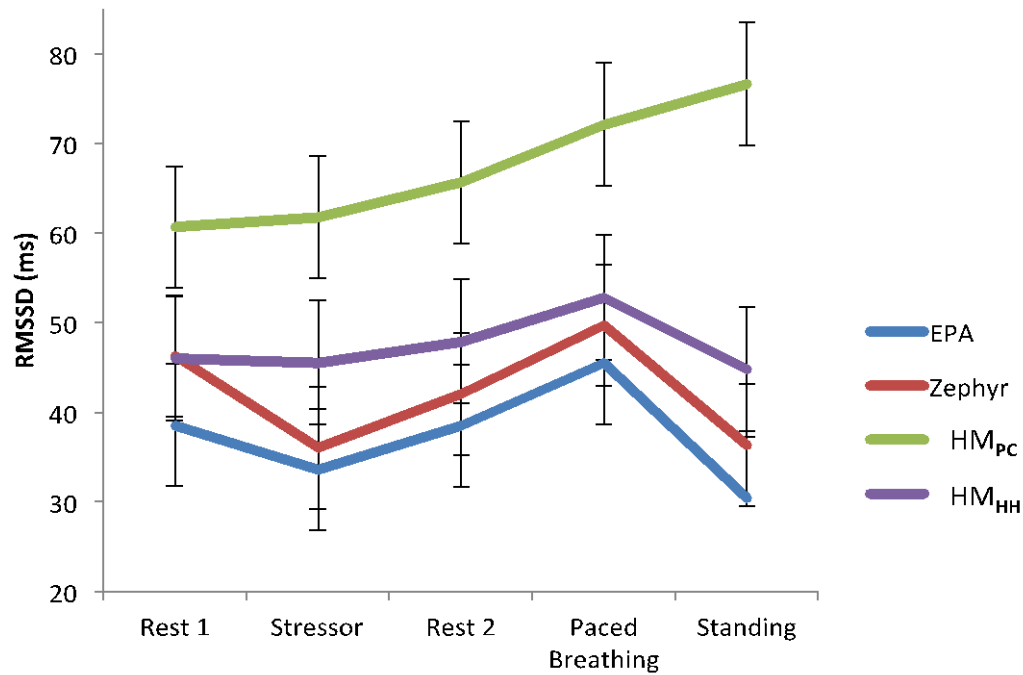

**Figure 2. Root mean square of successive differences values (RMSSD):** (a) When aggregating data across both sessions, there was a main effect of segment, indicating a general decrease in RMSSD from initial rest, in response to the stressor, followed by a general increase during the recovery portion of the paradigm and then a slight decrease in RMSSD during the standing segment ( $F=2.97, p=.02$ ); (b) There appeared to be a main effect of device, such that HM<sub>PC</sub> tended to display greater RMSSD values compared to all other devices ( $F=41.76, p<.001$ ), with post-hoc analyses revealing higher RMSSD value at each time segment for the HM<sub>PC</sub> device compared to EPA6; and (c) when examining the interaction between device and segment all 4 devices tended to vary in a similar pattern throughout the session ( $F=1.00, p=.45$ ). Data from a linear mixed model with two fixed factors (device, segment) and a random subject effect to calculate the difference between devices and between sessions.



**Figure 3. STD HR**

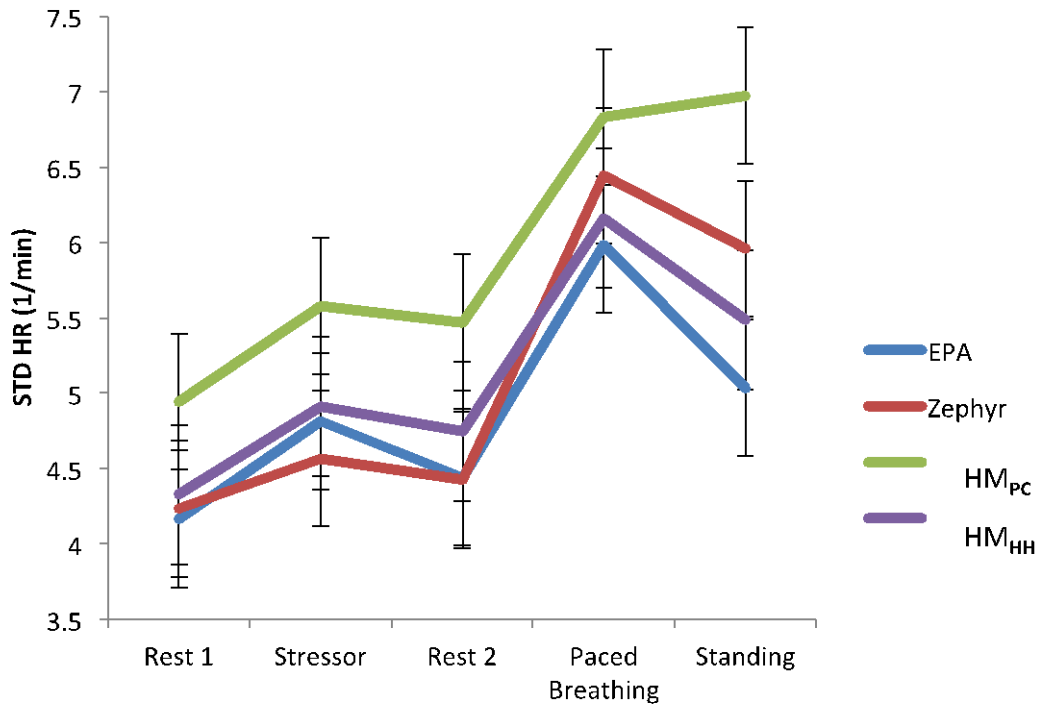

**Figure 3. Standard deviation of instantaneous heart values (STD HR):** (a) When aggregating data across both sessions, there was a main effect of segment, indicating a general increase in STD HR from initial rest, in response to the stressor, followed by a general decrease during the recovery portion of the paradigm and then a slight decrease in STD HR during the standing segment ( $F=19.62$ ,  $p<.001$ ); (b) There appeared to be a main effect of device, such that HM<sub>PC</sub> tended to display greater STD HR values compared to all other devices ( $F=8.48$ ,  $p<.001$ ), with post-hoc analyses revealing higher STD HR value at standing for the HM<sub>PC</sub> device compared to EPA6; and (c) when examining the interaction between device and segment all 4 devices tended to vary in a similar pattern throughout the session ( $F=.53$ ,  $p=.90$ ). Data from a linear mixed model with two fixed factors (device, segment) and a random subject effect to calculate the difference between devices and between sessions.



**Figure 4. Mean HR**

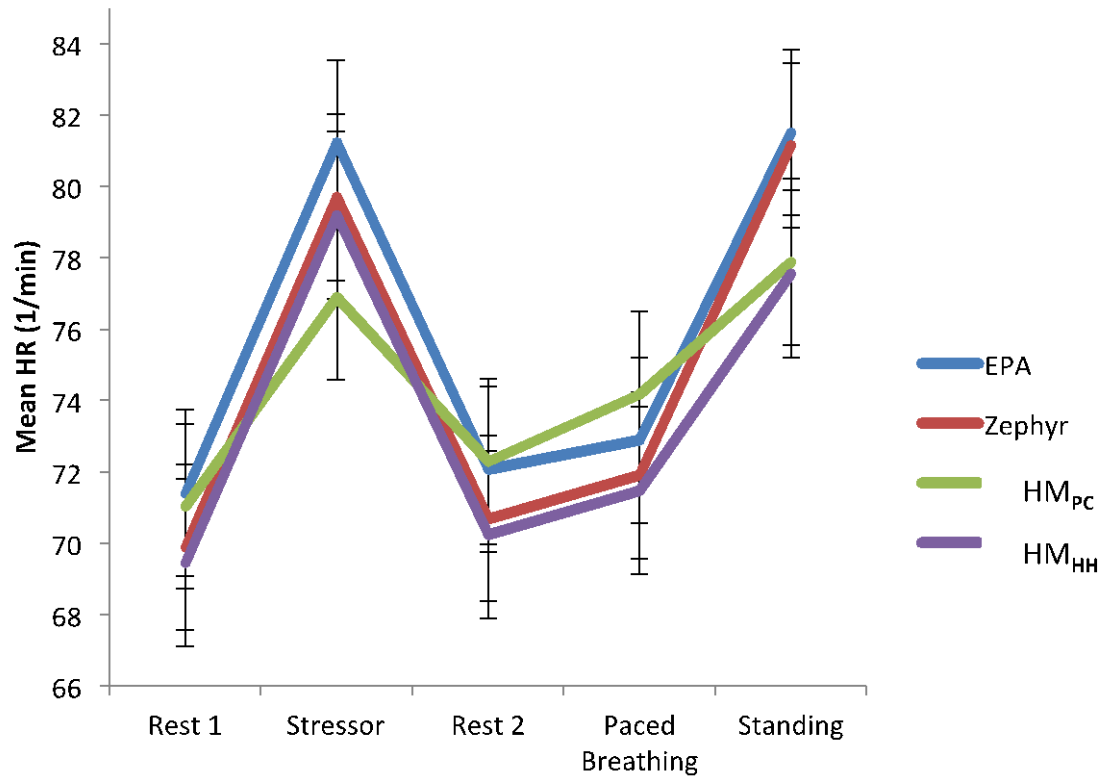

**Figure 4. Mean heart rate values (Mean HR):** (a) When aggregating data across both sessions, there was a main effect of segment, indicating a general increase in Mean HR from initial rest, in response to the stressor, followed by a general decrease during the recovery portion of the paradigm and then a slight increase in Mean HR during the standing segment ( $F=62.04$ ,  $p<.001$ ); (b) There appeared to be a main effect of device, such that HM<sub>HH</sub> tended to display lower Mean HR values compared to the EPA6 device ( $F=3.32$ ,  $p=.02$ ); and (c) when examining the interaction between device and segment all 4 devices tended to vary in a similar pattern throughout the session ( $F=1.32$ ,  $p=.20$ ). Data from a linear mixed model with two fixed factors (device, segment) and a random subject effect to calculate the difference between devices and between sessions.



**Figure 5. Low Frequency / High Frequency (LF/HF)**

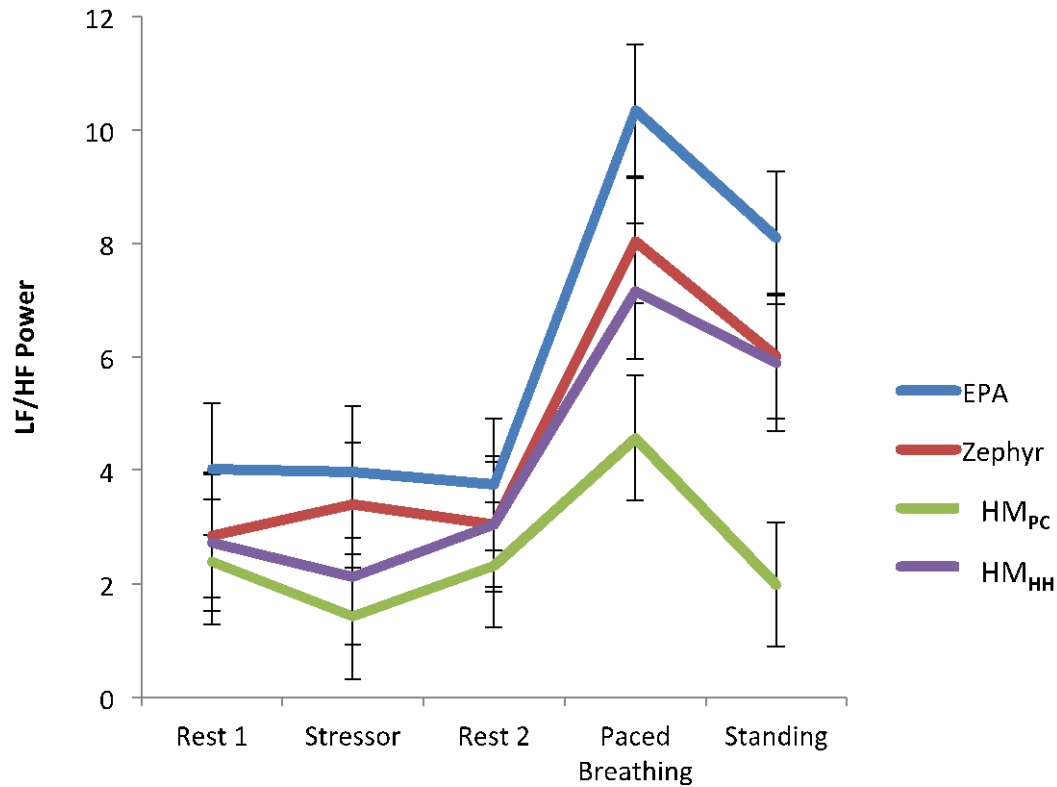

**Figure 5. Low frequency to high frequency ratio values (LF/HF):** (a) When aggregating data across both sessions, there was a main effect of segment, indicating a general increase in LF/HF from the stressor to the paced breathing portion of the paradigm and then a slight decrease in LF/HF during the standing segment ( $F=17.64$ ,  $p<.001$ ); (b) There appeared to be a main effect of device, such that HM<sub>PC</sub> tended to display lower LF/HF values compared to all other devices ( $F=10.65$ ,  $p<.001$ ) with post-hoc analyses revealing that at standing, HM<sub>PC</sub> displayed lower LF/HF compared to EPA6; and (c) when examining the interaction between device and segment all 4 devices tended to vary in a similar pattern throughout the session ( $F=1.01$ ,  $p=.44$ ). Data from a linear mixed model with two fixed factors (device, segment) and a random subject effect to calculate the difference between devices and between sessions.



**Table 1. Operational reliability of the four devices**

Device Operational Reliability expressed numerically as probability of successful operations ( $p_s$ ) and probability of operational failures ( $p_f$ ) based upon observed recordings of 140 time segments. ( $p_s + p_f = 1$ )

| Device           | Successful Operations | Probability of success | Probability of failure |
|------------------|-----------------------|------------------------|------------------------|
| EPA6             | 140/140               | 1.0000                 | 0.0000                 |
| BioPatch         | 140/140               | 1.0000                 | 0.0000                 |
| HM <sub>PC</sub> | 113/140               | 0.8071                 | 0.1929                 |
| HM <sub>HH</sub> | 125/140               | 0.8929                 | 0.1071                 |



**Table 2. Numerical Values of Heart Rate Variability Measures**

Mean numerical values of six measures of heart rate variability in five conditions (Rest 1, Stressor, Rest 2, Paced Breathing, Standing) for each of four devices (EPA6, BioPatch, HM<sub>PC</sub>, HM<sub>HH</sub>). The numerical results present the mean values and the standard deviations of those means. The six measures are: mean RR interval (RR<sub>Mean</sub>), standard deviation of RR intervals (SDNN), mean heart rate (HR<sub>Mean</sub>), standard deviation of heart rate (STD HR), root mean square of successive differences (RMSSD) and the ratio of low frequency to high frequency spectral power (LF/HF Power), HF power, LF power (mean±standard deviation)

|                                            | <b>EPA6</b>        | <b>BioPatch</b>    | <b>HM<sub>PC</sub></b> | <b>HM<sub>HH</sub></b> |
|--------------------------------------------|--------------------|--------------------|------------------------|------------------------|
| RR <sub>Mean</sub> (ms)<br>Rest 1          | 859.00 ±<br>108.19 | 876.91 ±<br>104.78 | 860.18 ±<br>87.87      | 896.20 ±<br>91.65      |
| RR <sub>Mean</sub> (ms)<br>Stressor        | 754.23 ±<br>91.46  | 768.49 ±<br>85.92  | 794.14 ±<br>80.49      | 787.16 ±<br>87.30      |
| RR <sub>Mean</sub> (ms)<br>Rest 2          | 849.80 ±<br>97.23  | 866.55 ±<br>98.11  | 846.10 ±<br>86.07      | 886.59 ±<br>87.66      |
| RR <sub>Mean</sub> (ms)<br>Paced Breath    | 846.69 ±<br>114.02 | 858.76 ±<br>111.53 | 827.68 ±<br>85.66      | 878.04 ±<br>102.99     |
| RR <sub>Mean</sub> (ms)<br>Standing        | 750.38 ±<br>78.84  | 755.11 ±<br>82.62  | 784.05 ±<br>57.59      | 800.35 ±<br>69.46      |
|                                            | <b>EPA6</b>        | <b>BioPatch</b>    | <b>HM<sub>PC</sub></b> | <b>HM<sub>HH</sub></b> |
| SDNN (ms)<br>Rest 1                        | 46.30 ±<br>26.17   | 48.75 ±<br>26.84   | 55.03 ±<br>26.49       | 50.20 ±<br>24.45       |
| SDNN (ms)<br>Stressor                      | 40.81 ±<br>22.55   | 39.97 ±<br>18.76   | 51.34 ±<br>18.57       | 43.22 ±<br>14.02       |
| SDNN (ms)<br>Rest 2                        | 47.06 ±<br>22.76   | 48.41 ±<br>22.80   | 58.38 ±<br>18.73       | 52.54 ±<br>23.48       |
| SDNN (ms)<br>Paced Breath                  | 66.38 ±<br>27.98   | 68.41 ±<br>27.11   | 69.05 ±<br>16.19       | 68.04 ±<br>24.60       |
| SDNN (ms)<br>Standing                      | 42.64 ±<br>15.86   | 48.33 ±<br>20.39   | 63.68 ±<br>15.26       | 51.08 ±<br>15.11       |
|                                            | <b>EPA6</b>        | <b>BioPatch</b>    | <b>HM<sub>PC</sub></b> | <b>HM<sub>HH</sub></b> |
| HR <sub>Mean</sub> (1/min)<br>Rest 1       | 71.40 ±<br>9.27    | 69.89 ±<br>8.36    | 71.03 ±<br>7.52        | 68.08 ±<br>6.64        |
| HR <sub>Mean</sub> (1/min)<br>Stressor     | 81.22 ±<br>9.69    | 79.69 ±<br>8.99    | 76.90 ±<br>7.96        | 77.82 ±<br>8.90        |
| HR <sub>Mean</sub> (1/min)<br>Rest 2       | 72.08 ±<br>8.56    | 70.69 ±<br>8.29    | 72.29 ±<br>7.68        | 68.89 ±<br>6.72        |
| HR <sub>Mean</sub> (1/min)<br>Paced Breath | 72.88 ±<br>10.45   | 71.89 ±<br>9.72    | 74.16 ±<br>8.39        | 70.11 ±<br>8.53        |
| HR <sub>Mean</sub> (1/min)<br>Standing     | 81.51 ±<br>8.46    | 81.15 ±<br>8.85    | 77.89 ±<br>5.91        | 76.18 ±<br>6.72        |



**Table 2. Continued Numerical Values of Heart Rate Variability Measures**

|                                | <b>EPA6</b>       | <b>BioPatch</b>  | <b>HM<sub>PC</sub></b> | <b>HM<sub>HH</sub></b> |
|--------------------------------|-------------------|------------------|------------------------|------------------------|
| STD HR (1/min)<br>Rest 1       | 4.166 ±<br>1.502  | 4.236 ±<br>1.304 | 4.944 ±<br>1.581       | 4.354 ±<br>1.619       |
| STD HR (1/min)<br>Stressor     | 4.815 ±<br>2.095  | 4.569 ±<br>1.352 | 5.578 ±<br>1.720       | 4.936 ±<br>1.321       |
| STD HR (1/min)<br>Rest 2       | 4.442 ±<br>1.268  | 4.426 ±<br>1.190 | 5.471 ±<br>1.114       | 4.773 ±<br>1.831       |
| STD HR (1/min)<br>Paced Breath | 5.986 ±<br>2.103  | 6.442 ±<br>2.064 | 6.831 ±<br>1.822       | 6.187 ±<br>1.944       |
| STD HR (1/min)<br>Standing     | 5.033 ±<br>1.554  | 5.958 ±<br>2.285 | 6.971 ±<br>2.076       | 5.512 ±<br>1.419       |
|                                | <b>EPA6</b>       | <b>BioPatch</b>  | <b>HM<sub>PC</sub></b> | <b>HM<sub>HH</sub></b> |
| RMSSD (ms)<br>Rest1            | 38.55 ±<br>26.09  | 46.27 ±<br>32.72 | 60.68 ±<br>37.85       | 47.22 ±<br>23.68       |
| RMSSD (ms)<br>Stressor         | 33.59 ±<br>25.53  | 36.04 ±<br>24.92 | 61.78 ±<br>27.74       | 46.74 ±<br>17.18       |
| RMSSD (ms)<br>Rest 2           | 38.53 ±<br>24.43  | 42.04 ±<br>24.44 | 65.69 ±<br>29.19       | 49.08 ±<br>24.52       |
| RMSSD (ms)<br>Paced Breath     | 45.46 ±<br>26.29  | 49.74 ±<br>24.54 | 72.12 ±<br>23.20       | 53.99 ±<br>23.91       |
| RMSSD (ms)<br>Standing         | 30.42 ±<br>19.82  | 36.35 ±<br>21.76 | 76.63 ±<br>24.78       | 45.99 ±<br>18.68       |
|                                | <b>EPA6</b>       | <b>BioPatch</b>  | <b>HM<sub>PC</sub></b> | <b>HM<sub>HH</sub></b> |
| LF/HF Power<br>Rest 1          | 4.021±<br>3.626   | 2.851 ±<br>2.151 | 2.392 ±<br>2.960       | 2.770 ±<br>2.456       |
| LF/HF Power<br>Stressor        | 3.969 ±<br>2.953  | 3.394 ±<br>2.552 | 1.422 ±<br>0.824       | 2.175 ±<br>1.890       |
| LF/HF Power<br>Rest 2          | 3.754 ±<br>3.048  | 3.043 ±<br>1.995 | 2.329 ±<br>2.178       | 3.106 ±<br>2.400       |
| LF/HF Power<br>Paced Breath    | 10.348 ±<br>7.581 | 8.043 ±<br>6.079 | 4.568 ±<br>5.451       | 7.213 ±<br>5.949       |
| LF/HF Power<br>Standing        | 8.101 ±<br>8.427  | 6.016 ±<br>4.724 | 1.986 ±<br>2.626       | 5.946 ±<br>6.793       |



**Table 2. Continued Numerical Values of Heart Rate Variability Measures**

|                          | <b>EPA6</b>       | <b>BioPatch</b>   | <b>HM<sub>PC</sub></b> | <b>HM<sub>HH</sub></b> |
|--------------------------|-------------------|-------------------|------------------------|------------------------|
| HF Power<br>Rest 1       | 30.964<br>±20.824 | 34.039<br>±18.954 | 48.393<br>±21.396      | 38.110<br>±18.993      |
| HF Power<br>Stressor     | 26.447<br>±14.026 | 28.596<br>±14.637 | 48.491<br>±15.802      | 36.091<br>±16.259      |
| HF Power<br>Rest 2       | 30.542<br>±19.558 | 31.449<br>±16.955 | 46.899<br>±21.156      | 33.576<br>±18.952      |
| HF Power<br>Paced Breath | 16.424<br>±14.533 | 17.821<br>±12.902 | 44.415<br>±21.593      | 22.295<br>±17.870      |
| HF Power<br>Standing     | 22.203<br>±18.077 | 22.109<br>±14.601 | 50.051<br>±15.598      | 24.081<br>±15.026      |

|                          | <b>EPA6</b>       | <b>BioPatch</b>   | <b>HM<sub>PC</sub></b> | <b>HM<sub>HH</sub></b> |
|--------------------------|-------------------|-------------------|------------------------|------------------------|
| LF Power<br>Rest 1       | 63.572<br>±20.261 | 60.118<br>±18.498 | 47.138<br>±20.106      | 55.998<br>±18.548      |
| LF Power<br>Stressor     | 67.269<br>±13.179 | 64.718<br>±13.730 | 47.600<br>±15.116      | 58.050<br>±15.358      |
| LF Power<br>Rest 2       | 62.908<br>±19.153 | 63.069<br>±16.081 | 48.939<br>±20.401      | 59.706<br>±17.103      |
| LF Power<br>Paced Breath | 81.435<br>±15.569 | 79.269<br>±14.794 | 52.738<br>±22.290      | 74.987<br>±19.324      |
| LF Power<br>Standing     | 73.811<br>±18.998 | 73.030<br>±16.814 | 46.795<br>±15.411      | 70.204<br>15.895       |



**Table 3. Minimal Detectable Difference with Confidence Intervals**

|                                            | <b>EPA6</b>               | <b>BioPatch</b>           | <b>HM<sub>PC</sub></b>    | <b>HM<sub>HH</sub></b>    |
|--------------------------------------------|---------------------------|---------------------------|---------------------------|---------------------------|
| RR <sub>Mean</sub> (ms)<br>Rest1           | 137.21<br>[80.66, 219.13] | 146.35<br>[86.74, 229.34] | 137.00<br>[75.56, 220.89] | 126.23<br>[66.05, 216.11] |
| RR <sub>Mean</sub> (ms)<br>Stressor        | 136.79<br>[81.64, 211.11] | 132.19<br>[79.15, 202.62] | 105.73<br>[57.24, 178.43] | 140.14<br>[74.71, 229.03] |
| RR <sub>Mean</sub> (ms)<br>Rest 2          | 158.55<br>[95.62, 239.43] | 155.00<br>[93.11, 236.06] | 158.07<br>[89.48, 241.20] | 138.83<br>[73.87, 227.90] |
| RR <sub>Mean</sub> (ms)<br>Paced Breath1   | 108.51<br>[62.75, 180.59] | 108.28<br>[62.67, 179.80] | 136.15<br>[75.29, 218.24] | 120.37<br>[61.10, 214.41] |
| RR <sub>Mean</sub> (ms)<br>Standing1       | 159.47<br>[99.82, 225.12] | 117.60<br>[69.83, 183.54] | 149.06<br>[93.67, 194.44] | 122.53<br>[59.89, 203.61] |
|                                            | <b>EPA6</b>               | <b>BioPatch</b>           | <b>HM<sub>PC</sub></b>    | <b>HH<sub>HH</sub></b>    |
| SDNN (ms)<br>Rest 1                        | 29.83<br>[17.41, 48.49]   | 72.08<br>[49.48, 90.12]   | 26.63<br>[14.14, 47.29]   | 28.71<br>[14.82, 51.09]   |
| SDNN (ms)<br>Stressor                      | 56.29<br>[37.47, 72.89]   | 23.79<br>[13.98, 37.99]   | 17.07<br>[9.04, 30.69]    | 17.14<br>[8.87, 30.23]    |
| SDNN (ms)<br>Rest 2                        | 20.17<br>[11.63, 33.82]   | 21.14<br>[12.21, 35.28]   | 35.51<br>[20.23, 53.53]   | 21.71<br>[11.05, 40.30]   |
| SDNN (ms)<br>Paced Breath                  | 33.04<br>[19.33, 53.41]   | 32.01<br>[18.72, 51.75]   | 27.67<br>[15.47, 43.32]   | 32.20<br>[16.76, 55.87]   |
| SDNN (ms)<br>Standing                      | 16.60<br>[9.64, 27.31]    | 22.63<br>[13.19, 36.94]   | 26.21<br>[14.67, 40.97]   | 19.61<br>[9.18, 36.55]    |
|                                            | <b>EPA6</b>               | <b>BioPatch</b>           | <b>HM<sub>PC</sub></b>    | <b>HM<sub>HH</sub></b>    |
| HR <sub>Mean</sub> (1/min)<br>Rest 1       | 11.05<br>[6.46, 17.83]    | 11.73<br>[6.95, 18.36]    | 10.84<br>[5.92, 17.87]    | 9.87<br>[5.21, 16.54]     |
| HR <sub>Mean</sub> (1/min)<br>Stressor     | 16.96<br>[10.33, 25.10]   | 16.42<br>[10.08, 23.99]   | 10.64<br>[5.77, 17.88]    | 17.65<br>[9.79, 26.59]    |
| HR <sub>Mean</sub> (1/min)<br>Rest 2       | 13.97<br>[8.43, 21.10]    | 12.91<br>[7.74, 19.73]    | 13.51<br>[7.59, 20.94]    | 11.84<br>[6.41, 18.71]    |
| HR <sub>Mean</sub> (1/min)<br>Paced Breath | 10.14<br>[5.87, 16.84]    | 10.15<br>[5.89, 16.70]    | 12.36<br>[6.77, 20.26]    | 10.72<br>[5.56, 18.78]    |
| HR <sub>Mean</sub> (1/min)<br>Stdanding    | 17.14<br>[10.73, 24.18]   | 12.24<br>[7.25, 19.22]    | 15.34<br>[9.65, 19.98]    | 12.67<br>[6.28, 20.41]    |



**Table 3. Continued Minimal Detectable Difference with Confidence Intervals**

|                              | <b>EPA6</b>              | <b>BioPatch</b>           | <b>HM<sub>PC</sub></b>   | <b>HM<sub>HH</sub></b>     |
|------------------------------|--------------------------|---------------------------|--------------------------|----------------------------|
| STD HR (ms)<br>Rest1         | 2.101<br>[1.245, 3.291]  | 1.515<br>[0.885, 2.456]   | 2.860<br>[1.615, 4.389]  | 2.085<br>[1.084, 3.632]    |
| STD HR (ms)<br>Stressor      | 5.163<br>[3.420, 6.725]  | 2.288<br>[1.387, 3.421]   | 2.201<br>[1.189, 3.736]  | 2.101<br>[1.118, 3.444]    |
| STD HR (ms)<br>Rest 2        | 1.710<br>[1.010, 2.699]  | 1.863<br>[1.118, 2.844]   | 3.092<br>[2.015, 3.878]  | 2.989<br>[1.597, 4.857]    |
| STD HR (ms)<br>Paced Breath1 | 3.172<br>[1.895, 4.886]  | 5.338<br>[3.603, 6.798]   | 3.276<br>[1.847, 5.038]  | 2.795<br>[1.469, 4.728]    |
| STD HR (ms)<br>Standing1     | 2.269<br>[1.351, 3.521]  | 4.862<br>[3.080, 6.735]   | 3.789<br>[2.142, 5.795]  | 2.291<br>[1.103, 3.954]    |
|                              | <b>EPA6</b>              | <b>BioPatch</b>           | <b>HM<sub>PC</sub></b>   | <b>HH<sub>HH</sub></b>     |
| RMSSD (ms)<br>Rest 1         | 31.15<br>[18.23, 50.26]  | 84.95<br>[57.44, 107.98]  | 30.96<br>[16.32, 56.44]  | 45.44<br>[25.01, 69.41]    |
| RMSSD (ms)<br>Stressor       | 53.15<br>[33.49, 74.24]  | 44.51<br>[27.21, 65.49]   | 35.92<br>[19.42, 60.82]  | 28.80<br>[15.46, 46.36]    |
| RMSSD (ms)<br>Rest 2         | 33.27<br>[19.68, 52.42]  | 37.40<br>[22.38, 57.41]   | 47.51<br>[26.36, 75.59]  | 39.55<br>[21.10, 64.53]    |
| RMSSD (ms)<br>Paced Breath   | 36.11<br>[21.37, 56.79]  | 27.22<br>[15.86, 44.43]   | 34.09<br>[18.67, 55.91]  | 25.95<br>[13.32, 46.91]    |
| RMSSD (ms)<br>Standing       | 33.98<br>[20.64, 50.61]  | 29.40<br>[17.37, 46.38]   | 42.19<br>[23.57, 66.14]  | 27.76<br>[13.20, 49.95]    |
|                              | <b>EPA6</b>              | <b>BioPatch</b>           | <b>HM<sub>PC</sub></b>   | <b>HM<sub>HH</sub></b>     |
| LF/HF Power<br>Rest 1        | 3.396<br>[1.962, 5.661]  | 2.384<br>[1.389, 3.891]   | 2.841<br>[1.507, 5.079]  | 3.635<br>[1.917, 6.096]    |
| LF/HF Power<br>Stressor      | 5.044<br>[3.062, 7.519]  | 3.592<br>[2.131, 5.619]   | 2.217<br>[1.421, 2.831]  | 2.442<br>[1.270, 4.251]    |
| LF/HF Power<br>Rest 2        | 3.754<br>[2.202, 6.026]  | 4.016<br>[2.511, 5.678]   | 4.430<br>[2.564, 6.491]  | 2.902<br>[1.501, 5.131]    |
| LF/HF Power<br>Paced Breath  | 14.54<br>[9.002, 20.909] | 13.955<br>[9.028, 18.751] | 7.524<br>[4.092, 12.545] | 13.785<br>[8.001, 19.283]  |
| LF/HF Power<br>Standing      | 7.571<br>[4.368, 12.676] | 9.210<br>[5.721, 13.171]  | 7.467<br>[4.938, 9.236]  | 19.062<br>[11.102, 24.406] |



**Table 3. Continued Minimal Detectable Difference with Confidence Intervals**

|                          | <b>EPA6</b>             | <b>BioPatch</b>        | <b>HM<sub>PC</sub></b>  | <b>HM<sub>HH</sub></b>  |
|--------------------------|-------------------------|------------------------|-------------------------|-------------------------|
| HF Power<br>Rest 1       | 28.24<br>[5.86, 39.50]  | 24.10<br>[3.97, 33.85] | 21.16<br>[0.00, 31.11]  | 32.74<br>[0.00, 46.92]  |
| HF Power<br>Stressor     | 23.60<br>[7.94, 32.42]  | 20.79<br>[4.90, 28.99] | 35.43<br>[14.43, 47.98] | 20.26<br>[0.00, 29.87]  |
| HF Power<br>Rest 2       | 20.71<br>[0.00, 29.35]  | 20.80<br>[2.90, 29.27] | 34.83<br>[0.00, 49.52]  | 26.63<br>[0.00, 38.94]  |
| HF Power<br>Paced Breath | 20.74<br>[4.95, 28.91]  | 22.14<br>[7.70, 30.35] | 33.93<br>[0.00, 48.47]  | 42.49<br>[17.73, 57.42] |
| HF Power<br>Standing     | 35.58<br>[15.39, 47.91] | 19.60<br>[3.94, 27.44] | 43.78<br>[27.55, 55.45] | 26.51<br>[0.00, 39.15]  |

|                          | <b>EPA6</b>             | <b>BioPatch</b>         | <b>HM<sub>PC</sub></b>  | <b>HM<sub>HH</sub></b>  |
|--------------------------|-------------------------|-------------------------|-------------------------|-------------------------|
| LF Power<br>Rest 1       | 26.73<br>[5.05, 37.46]  | 20.26<br>[0.00, 28.68]  | 21.14<br>[0.00, 31.00]  | 32.63<br>[0.00, 46.65]  |
| LF Power<br>Stressor     | 24.75<br>[9.97, 33.55]  | 23.49<br>[8.14, 32.21]  | 32.86<br>[12.37, 44.80] | 23.94<br>[0.00, 34.69]  |
| LF Power<br>Rest 2       | 20.60<br>[0.00, 29.17]  | 22.18<br>[4.82, 30.99]  | 32.42<br>[0.00, 46.25]  | 24.44<br>[0.00, 35.69]  |
| LF Power<br>Paced Breath | 37.56<br>[9.61, 52.25]  | 30.10<br>[13.65, 40.32] | 33.38<br>[0.00, 47.89]  | 46.87<br>[20.61, 62.99] |
| LF Power<br>Standing     | 35.86<br>[14.56, 48.57] | 24.50<br>[6.15, 34.10]  | 43.49<br>[27.60, 54.96] | 30.52<br>[0.00, 44.50]  |



**Table 4. Intraclass correlation coefficients**

Intraclass correlation coefficients (ICC (2,1), Shrout and Fleiss, 1979) for six measures of heart rate variability (Mean RR, SDNN, Mean HR, STD HR, RMSSD, LF/HF Power), in five conditions (Rest 1, Stressor, Rest 2, Paced Breathing, Standing), for each of four devices (EPA6, BioPatch, HM<sub>PC</sub>, HM<sub>HH</sub>). Numerical results report the intraclass correlation coefficient, and the corresponding 95% confidence intervals.

|                                         | <b>EPA6</b>                 | <b>Biopatch</b>             | <b>HM<sub>PC</sub></b>      | <b>HM<sub>HH</sub></b>      |
|-----------------------------------------|-----------------------------|-----------------------------|-----------------------------|-----------------------------|
| RR <sub>Mean</sub> (ms)<br>Rest 1       | 0.7907<br>[0.4661, 0.9277]  | 0.7461<br>[0.3764, 0.9108]  | 0.6836<br>[0.1776, 0.9038]  | 0.7531<br>[0.2763, 0.9324]  |
| RR <sub>Mean</sub> (ms)<br>Stressor     | 0.7088<br>[0.3065, 0.8963]  | 0.6919<br>[0.2761, 0.8895]  | 0.7755<br>[0.3605, 0.9342]  | 0.6646<br>[0.1042, 0.9047]  |
| RR <sub>Mean</sub> (ms)<br>Rest 2       | 0.6540<br>[0.2108, 0.8741]  | 0.6751<br>[0.2468, 0.8828]  | 0.5610<br>[-0.0222, 0.8593] | 0.6735<br>[0.1202, 0.9076]  |
| RR <sub>Mean</sub> (ms)<br>Paced Breath | 0.8821<br>[0.6735, 0.9606]  | 0.8773<br>[0.6617, 0.9589]  | 0.6712<br>[0.1552, 0.8995]  | 0.8222<br>[0.4359, 0.9527]  |
| RR <sub>Mean</sub> (ms)<br>Standing     | 0.4675<br>[-0.0611, 0.7914] | 0.7363<br>[0.3576, 0.9070]  | 0.1281<br>[-0.4836, 0.6557] | 0.5950<br>[-0.1183, 0.9032] |
|                                         | <b>EPA6</b>                 | <b>Biopatch</b>             | <b>HM<sub>PC</sub></b>      | <b>HM<sub>HH</sub></b>      |
| SDNN (ms)<br>Rest 1                     | 0.8309<br>[0.5532, 0.9424]  | 0.0614<br>[-0.4673, 0.5578] | 0.8684<br>[0.5851, 0.9628]  | 0.8205<br>[0.4317, 0.9522]  |
| SDNN (ms)<br>Stressor                   | 0.1890<br>[-0.3599, 0.6408] | 0.7907<br>[0.4662, 0.9277]  | 0.8901<br>[0.6445, 0.9692]  | 0.8055<br>[0.3950, 0.9479]  |
| SDNN (ms)<br>Rest 2                     | 0.8977 [0.7125,<br>0.9660]  | 0.8882 [0.6884,<br>0.9627]  | 0.5322<br>[-0.0631, 0.8482] | 0.8887 [0.6165,<br>0.9711]  |
| SDNN (ms)<br>Paced Breath               | 0.8185<br>[0.5256, 0.9379]  | 0.8185<br>[0.5257, 0.9379]  | 0.6196<br>[0.0678, 0.8811]  | 0.7772<br>[0.3290, 0.9396]  |
| SDNN (ms)<br>Standing                   | 0.8574<br>[0.6140, 0.9519]  | 0.8397<br>[0.5731, 0.9456]  | 0.6159<br>[0.0619, 0.8798]  | 0.7810<br>[0.2389, 0.9519]  |



**Table 4. Continued: Intraclass correlation coefficients**

|                                               | <b>EPA6</b>                 | <b>Biopatch</b>             | <b>HMPC</b>                  | <b>HMHH</b>                 |
|-----------------------------------------------|-----------------------------|-----------------------------|------------------------------|-----------------------------|
| HR <sub>Mean</sub><br>(1/min)<br>Rest 1       | 0.8152<br>[0.5185, 0.9367]  | 0.7439<br>[0.3722, 0.9099]  | 0.7296<br>[0.2650, 0.9193]   | 0.7127<br>[0.1937, 0.9200]  |
| HR <sub>Mean</sub><br>(1/min)<br>Stressor     | 0.6019<br>[0.1272, 0.8522]  | 0.5656<br>[0.0728, 0.8364]  | 0.7677<br>[0.3437, 0.9317]   | 0.4883<br>[-0.1612, 0.8426] |
| HR <sub>Mean</sub><br>(1/min)<br>Rest 2       | 0.6536<br>[0.2103, 0.8740]  | 0.6843<br>[0.2628, 0.8865]  | 0.5966<br>[0.0314, 0.8727]   | 0.5957<br>[-0.0100, 0.8816] |
| HR <sub>Mean</sub><br>(1/min)<br>Paced Breath | 0.8774<br>[0.6619, 0.9589]  | 0.8581<br>[0.6157, 0.9521]  | 0.7173<br>[0.2408, 0.9152]   | 0.7944<br>[0.3687, 0.9447]  |
| HR <sub>Mean</sub><br>(1/min)<br>Standing     | 0.4657<br>[-0.0635, 0.7905] | 0.7511<br>[0.3862, 0.9127]  | 0.1233<br>[-0.4873, 0.6529]  | 0.5371<br>[-0.2013, 0.8863] |
|                                               | <b>EPA6</b>                 | <b>Biopatch</b>             | <b>HM<sub>PC</sub></b>       | <b>HM<sub>HH</sub></b>      |
| STD HR<br>Rest 1                              | 0.7455<br>[0.3753, 0.9106]  | 0.8244<br>[0.5387, 0.9401]  | 0.5739<br>[-0.0031, 0.8642]  | 0.7843<br>[0.3452, 0.9417]  |
| STD HR<br>Stressor                            | 0.2093<br>[-0.3414, 0.6530] | 0.6272<br>[0.1671, 0.8630]  | 0.7869<br>[0.3857, 0.9378]   | 0.6709<br>[0.1154, 0.9067]  |
| STD HR<br>Rest 2                              | 0.7636<br>[0.4109, 0.9175]  | 0.6807<br>[0.2564, 0.8850]  | -0.0030<br>[-0.5780, 0.5739] | 0.6534<br>[0.0845, 0.9010]  |
| STD HR<br>Paced Breath                        | 0.7037<br>[0.2973, 0.8943]  | 0.1295<br>[-0.4119, 0.6033] | 0.5794<br>[0.0052, 0.8663]   | 0.7309<br>[0.2301, 0.9256]  |
| STD HR<br>Standing                            | 0.7225<br>[0.3317, 0.9017]  | 0.4106<br>[-0.1310, 0.7635] | 0.5665<br>[-0.0141, 0.8614]  | 0.6608<br>[-0.0099, 0.9214] |



**Table 4. Continued: Intraclass correlation coefficients**

|                            | <b>EPA6</b>                 | <b>Biopatch</b>             | <b>HM<sub>PC</sub></b>     | <b>HM<sub>HH</sub></b>      |
|----------------------------|-----------------------------|-----------------------------|----------------------------|-----------------------------|
| RMSSD (ms)<br>Rest1        | 0.8145<br>[0.5170, 0.9365]  | 0.1224<br>[-0.4178, 0.5987] | 0.9129<br>[0.7106, 0.9758] | 0.5205<br>[-0.1188, 0.8547] |
| RMSSD (ms)<br>Stressor     | 0.4361<br>[-0.1004, 0.7761] | 0.5848<br>[0.1013, 0.8449]  | 0.7818<br>[0.3743, 0.9362] | 0.6340<br>[0.0517, 0.8946]  |
| RMSSD (ms)<br>Rest 2       | 0.7587<br>[0.4011, 0.9156]  | 0.6953<br>[0.2822, 0.8909]  | 0.6553<br>[0.1274, 0.8939] | 0.6613<br>[0.0984, 0.9036]  |
| RMSSD (ms)<br>Paced Breath | 0.7544<br>[0.3926, 0.9140]  | 0.8398<br>[0.5734, 0.9456]  | 0.7188<br>[0.2438, 0.9157] | 0.8467<br>[0.4989, 0.9596]  |
| RMSSD (ms)<br>Standing     | 0.6173<br>[0.1513, 0.8588]  | 0.7624<br>[0.4085, 0.9170]  | 0.6227<br>[0.0728, 0.8822] | 0.7124<br>[0.0875, 0.9349]  |

|                             | <b>EPA6</b>                | <b>Biopatch</b>             | <b>HM<sub>PC</sub></b>       | <b>HM<sub>HH</sub></b>       |
|-----------------------------|----------------------------|-----------------------------|------------------------------|------------------------------|
| LF/HF Power<br>Rest 1       | 0.8858<br>[0.6827, 0.9619] | 0.8401<br>[0.5739, 0.9457]  | 0.8802<br>[0.6169, 0.9663]   | 0.7148<br>[0.1979, 0.9207]   |
| LF/HF Power<br>Stressor     | 0.6204<br>[0.1562, 0.8601] | 0.7421<br>[0.3688, 0.9093]  | 0.0573<br>[-0.5364, 0.6131]  | 0.7827<br>[0.3416, 0.9412]   |
| LF/HF Power<br>Rest 2       | 0.8026<br>[0.4913, 0.9321] | 0.4725<br>[-0.0547, 0.7937] | 0.4618<br>[-0.1556, 0.8197]  | 0.8097<br>[0.4052, 0.9491]   |
| LF/HF Power<br>Paced Breath | 0.5212<br>[0.0098, 0.8165] | 0.3141<br>[-0.2384, 0.7130] | 0.7521<br>[0.3107, 0.9267]   | 0.3011<br>[-0.3676, 0.7646]  |
| LF/HF Power<br>Standing     | 0.8950<br>[0.7055, 0.9650] | 0.5053<br>[-0.0117, 0.8091] | -0.0525<br>[-0.6100, 0.5398] | -0.0248<br>[-0.6799, 0.6524] |



**Table 4. Continued: Intraclass correlation coefficients**

|                       | <b>EPA6</b>                | <b>Biopatch</b>            | <b>HM<sub>PC</sub></b>       | <b>HM<sub>HH</sub></b>      |
|-----------------------|----------------------------|----------------------------|------------------------------|-----------------------------|
| HF Power Rest 1       | 0.7607<br>[0.5317, 0.9897] | 0.7896<br>[0.5849, 0.9943] | 0.8727<br>[0.7248, 1.020]    | 0.6132<br>[0.2056, 1.021]   |
| HF Power Stressor     | 0.6315<br>[0.3047, 0.9583] | 0.7375<br>[0.4896, 0.9854] | 0.3458<br>[-0.200, 0.8915]   | 0.7979<br>[0.5606, 1.035]   |
| HF Power Rest 2       | 0.8540<br>[0.7068, 1.001]  | 0.8042<br>[0.6122, 0.9962] | 0.6472<br>[0.2870, 1.007]    | 0.7430<br>[0.4504, 1.036]   |
| HF Power Paced Breath | 0.7349<br>[0.4849, 0.9849] | 0.6167<br>[0.2798, 0.9536] | 0.6787<br>[0.3443, 1.013]    | 0.2642<br>[-0.3436, 0.8719] |
| HF Power Standing     | 0.4957<br>[0.0857, 0.9057] | 0.7654<br>[0.5403, 0.9905] | -0.0253<br>[-0.6449, 0.5939] | 0.5949<br>[0.1163, 1.074]   |

|                       | <b>EPA6</b>                | <b>Biopatch</b>            | <b>HM<sub>PC</sub></b>       | <b>HM<sub>HH</sub></b>      |
|-----------------------|----------------------------|----------------------------|------------------------------|-----------------------------|
| LF Power Rest 1       | 0.7735<br>[0.5551, 0.9919] | 0.8438<br>[0.6872, 1.000]  | 0.8561<br>[0.6906, 1.022]    | 0.5972<br>[0.1768, 1.018]   |
| LF Power Stressor     | 0.5409<br>[0.1563, 0.9255] | 0.6189<br>[0.2835, 0.9543] | 0.3850<br>[-0.1430, 0.9129]  | 0.6838<br>[0.3359, 1.032]   |
| LF Power Rest 2       | 0.8495<br>[0.6981, 1.001]  | 0.7525<br>[0.5167, 0.9883] | 0.6714<br>[0.3310, 1.012]    | 0.7343<br>[0.4332, 1.035]   |
| LF Power Paced Breath | 0.7191<br>[0.4565, 0.9816] | 0.4613<br>[0.0333, 0.8892] | 0.7081<br>[0.3991, 1.017]    | 0.2344<br>[-0.3830, 0.8519] |
| LF Power Standing     | 0.5364<br>[0.1493, 0.9236] | 0.7236<br>[0.4646, 0.9826] | -0.0366<br>[-0.6556, 0.5824] | 0.5202<br>[-0.0202, 1.061]  |



**Table 5. Standard Error of Measurement**

|                                            | <b>EPA6</b>             | <b>BioPatch</b>         | <b>HM<sub>PC</sub></b>  | <b>HM<sub>HH</sub></b>  |
|--------------------------------------------|-------------------------|-------------------------|-------------------------|-------------------------|
| RR <sub>Mean</sub> (ms)<br>Rest1           | 49.50<br>[29.10, 79.05] | 52.80<br>[31.29, 82.74] | 49.42<br>[27.26, 79.69] | 45.54<br>[23.83, 77.97] |
| RR <sub>Mean</sub> (ms)<br>Stressor        | 49.35<br>[29.45, 76.16] | 47.69<br>[28.56, 73.10] | 38.14<br>[20.65, 64.37] | 50.56<br>[26.95, 82.63] |
| RR <sub>Mean</sub> (ms)<br>Rest 2          | 57.20<br>[34.50, 86.38] | 55.92<br>[33.59, 85.15] | 57.03<br>[32.28, 87.02] | 50.08<br>[26.65, 82.22] |
| RR <sub>Mean</sub> (ms)<br>Paced Breath1   | 39.15<br>[22.64, 65.15] | 39.06<br>[22.61, 64.87] | 49.12<br>[27.16, 78.73] | 43.43<br>[22.41, 77.35] |
| RR <sub>Mean</sub> (ms)<br>Standing1       | 57.53<br>[36.01, 81.22] | 42.43<br>[25.19, 66.22] | 53.78<br>[33.79, 70.15] | 44.21<br>[21.61, 73.46] |
|                                            | <b>EPA6</b>             | <b>BioPatch</b>         | <b>HM<sub>PC</sub></b>  | <b>HH<sub>HH</sub></b>  |
| SDNN (ms)<br>Rest 1                        | 10.76<br>[6.29, 17.49]  | 26.00<br>[17.85, 32.51] | 9.61<br>[5.11, 17.06]   | 10.36<br>[5.35, 18.43]  |
| SDNN (ms)<br>Stressor                      | 20.31<br>[13.52, 26.30] | 8.58<br>[5.04, 13.71]   | 6.16<br>[3.26, 11.07]   | 6.18<br>[3.20, 10.91]   |
| SDNN (ms)<br>Rest 2                        | 7.28<br>[4.20, 12.20]   | 7.63<br>[4.41, 12.73]   | 12.81<br>[7.30, 19.31]  | 7.83<br>[3.99, 14.54]   |
| SDNN (ms)<br>Paced Breath                  | 11.92<br>[6.97, 19.27]  | 11.55<br>[6.75, 18.67]  | 9.98<br>[5.58, 15.63]   | 11.62<br>[6.05, 20.15]  |
| SDNN (ms)<br>Standing                      | 5.99<br>[3.48, 9.85]    | 8.16<br>[4.76, 13.33]   | 9.46<br>[5.29, 14.78]   | 7.07<br>[3.31, 13.19]   |
|                                            | <b>EPA6</b>             | <b>BioPatch</b>         | <b>HM<sub>PC</sub></b>  | <b>HM<sub>HH</sub></b>  |
| HR <sub>Mean</sub> (1/min)<br>Rest 1       | 3.99<br>[2.33, 6.43]    | 4.23<br>[2.51, 6.62]    | 3.91<br>[2.14, 6.45]    | 3.56<br>[1.88, 5.97]    |
| HR <sub>Mean</sub> (1/min)<br>Stressor     | 6.12<br>[3.73, 9.06]    | 5.92<br>[3.64, 8.66]    | 3.84<br>[2.08, 6.45]    | 6.37<br>[3.53, 9.59]    |
| HR <sub>Mean</sub> (1/min)<br>Rest 2       | 5.04<br>[3.04, 7.61]    | 4.66<br>[2.79, 7.12]    | 4.88<br>[2.74, 7.55]    | 4.27<br>[2.31, 6.75]    |
| HR <sub>Mean</sub> (1/min)<br>Paced Breath | 3.66<br>[2.12, 6.08]    | 3.66<br>[2.13, 6.03]    | 4.46<br>[2.44, 7.31]    | 3.87<br>[2.01, 6.78]    |
| HR <sub>Mean</sub> (1/min)<br>Stdanding    | 6.18<br>[3.87, 8.72]    | 4.42<br>[2.61, 6.93]    | 5.53<br>[3.48, 7.21]    | 4.57<br>[2.27, 7.36]    |



**Table 5. Continued. Standard Error of Measurement**

|                              | <b>EPA6</b>             | <b>BioPatch</b>         | <b>HM<sub>PC</sub></b>  | <b>HM<sub>HH</sub></b>  |
|------------------------------|-------------------------|-------------------------|-------------------------|-------------------------|
| STD HR (ms)<br>Rest1         | 0.758<br>[0.449, 1.187] | 0.547<br>[0.319, 0.886] | 1.032<br>[0.583, 1.583] | 0.752<br>[0.391, 1.310] |
| STD HR (ms)<br>Stressor      | 1.863<br>[1.234, 2.426] | 0.826<br>[5.501, 1.234] | 0.794<br>[0.429, 1.348] | 0.758<br>[0.404, 1.243] |
| STD HR (ms)<br>Rest 2        | 0.617<br>[0.364, 0.974] | 0.672<br>[0.403, 1.026] | 1.115<br>[0.727, 1.399] | 1.078<br>[0.576, 1.752] |
| STD HR (ms)<br>Paced Breath1 | 1.145<br>[0.684, 1.763] | 1.926<br>[1.300, 2.452] | 1.182<br>[0.666, 1.818] | 1.009<br>[0.530, 1.706] |
| STD HR (ms)<br>Standing1     | 0.818<br>[0.487, 1.270] | 1.754<br>[1.111, 2.430] | 1.367<br>[0.773, 2.091] | 0.827<br>[0.398, 1.426] |
|                              | <b>EPA6</b>             | <b>BioPatch</b>         | <b>HM<sub>PC</sub></b>  | <b>HM<sub>HH</sub></b>  |
| RMSSD (ms)<br>Rest 1         | 11.24<br>[6.58, 18.13]  | 30.65<br>[20.72, 38.96] | 11.17<br>[5.89, 20.36]  | 16.39<br>[9.02, 25.04]  |
| RMSSD (ms)<br>Stressor       | 19.17<br>[12.08, 26.78] | 16.06<br>[9.82, 23.63]  | 12.96<br>[7.01, 21.94]  | 10.39<br>[5.58, 16.73]  |
| RMSSD (ms)<br>Rest 2         | 12.00<br>[7.09, 18.91]  | 13.49<br>[8.07, 20.71]  | 17.14<br>[9.51, 27.27]  | 14.27<br>[7.61, 23.28]  |
| RMSSD (ms)<br>Paced Breath   | 13.03<br>[7.71, 20.49]  | 9.82<br>[5.72, 16.03]   | 12.30<br>[6.74, 20.17]  | 9.36<br>[4.81, 16.92]   |
| RMSSD (ms)<br>Standing       | 12.26<br>[7.45, 18.26]  | 10.61<br>[6.27, 16.73]  | 15.22<br>[8.50, 23.86]  | 10.02<br>[4.76, 17.84]  |
|                              | <b>EPA6</b>             | <b>BioPatch</b>         | <b>HM<sub>PC</sub></b>  | <b>HM<sub>HH</sub></b>  |
| LF/HF Power<br>Rest 1        | 1.225<br>[0.708, 2.042] | 0.860<br>[0.501, 1.404] | 1.025<br>[0.544, 1.832] | 1.312<br>[0.692, 2.199] |
| LF/HF Power<br>Stressor      | 1.820<br>[1.105, 2.713] | 1.296<br>[0.769, 2.027] | 0.800<br>[0.513, 1.021] | 0.881<br>[0.458, 1.534] |
| LF/HF Power<br>Rest 2        | 1.354<br>[0.794, 2.174] | 1.449<br>[0.906, 2.049] | 1.598<br>[0.925, 2.342] | 1.047<br>[0.541, 1.851] |
| LF/HF Power<br>Paced Breath  | 5.246<br>[3.248, 7.543] | 5.035<br>[3.257, 6.765] | 2.714<br>[1.476, 4.526] | 4.973<br>[2.886, 6.957] |
| LF/HF Power<br>Standing      | 2.731<br>[1.576, 4.573] | 3.323<br>[2.064, 4.752] | 2.694<br>[1.781, 3.332] | 6.877<br>[4.005, 8.805] |



**Table 5. Continued. Standard Error of Measurement**

|                          | EPA6                   | BioPatch              | HMPC                   | HMHH                   |
|--------------------------|------------------------|-----------------------|------------------------|------------------------|
| HF Power<br>Rest 1       | 10.19<br>[2.11, 14.25] | 8.69<br>[1.43, 12.21] | 7.63<br>[0.00, 11.22]  | 11.81<br>[0.00, 16.93] |
| HF Power<br>Stressor     | 8.51<br>[2.86, 11.70]  | 7.50<br>[1.77, 10.46] | 12.78<br>[5.21, 17.31] | 7.31<br>[0.00, 10.78]  |
| HF Power<br>Rest 2       | 7.47<br>[0.00, 10.59]  | 7.50<br>[1.05, 10.56] | 12.57<br>[0.00, 17.86] | 9.61<br>[0.00, 14.05]  |
| HF Power<br>Paced Breath | 7.48<br>[1.79, 10.43]  | 7.99<br>[2.78, 10.95] | 12.24<br>[0.00, 17.48] | 15.33<br>[6.40, 20.71] |
| HF Power<br>Standing     | 12.84<br>[5.55, 17.29] | 7.07<br>[1.42, 9.90]  | 15.79<br>[9.94, 20.01] | 9.56<br>[0.00, 14.13]  |

|                          | EPA6                      | BioPatch                  | HMPC                      | HMHH                      |
|--------------------------|---------------------------|---------------------------|---------------------------|---------------------------|
| LF Power<br>Rest 1       | 9.643<br>[1.023, 13.514]  | 7.311<br>[0.000, 10.346]  | 7.627<br>[0.000, 11.184]  | 11.772<br>[0.000, 16.829] |
| LF Power<br>Stressor     | 8.930<br>[3.597, 12.105]  | 8.476<br>[2.935, 11.622]  | 11.854<br>[4.461, 16.161] | 8.636<br>[0.000, 12.516]  |
| LF Power<br>Rest 2       | 7.430<br>[0.000, 10.524]  | 8.000<br>[1.739, 11.179]  | 11.695<br>[0.000, 16.686] | 8.816<br>[0.000, 12.876]  |
| LF Power<br>Paced Breath | 13.552<br>[3.468, 18.850] | 10.858<br>[4.924, 14.546] | 12.043<br>[0.000, 17.279] | 16.908<br>[7.437, 22.725] |
| LF Power<br>Standing     | 12.935<br>[5.251, 17.523] | 8.840<br>[2.218, 12.303]  | 15.690<br>[9.959, 19.829] | 11.010<br>[0.000, 16.055] |



**Table 6. Bland-Altman Limits of Agreement**

Limits of Agreement and 95% Confidence Intervals of five measures of heart rate variability (Mean RR, SDNN, Mean HR, STD HR, RMSSD, LF/HF Power), in five conditions (Rest 1, Stressor, Rest 2, Paced Breathing, Standing), comparing three devices (BioPatch, HM<sub>PC</sub>, HM<sub>HH</sub>) against the EPA6. Numerical results are: (1.) mean value of the inter-device difference and the standard deviation of that mean, (2.) the lower limit of agreement and the confidence interval of that limit of agreement, (3.) the upper limit of agreement and the confidence interval of that limit of agreement.

| Device 1 | Device 2 | Segment         | Measure     | Mean Difference<br>(SD) | Lower Limit of Agreement<br>(95%CI) | Upper Limit of Agreement<br>(95% CI) |
|----------|----------|-----------------|-------------|-------------------------|-------------------------------------|--------------------------------------|
| EPA6     | BioPatch | Rest 1          | Mean RR     | -18.808 (13.906)        | -46.063 (-59.97, -32.157)           | 8.447 (-5.459, 22.354)               |
| EPA6     | BioPatch | Stressor        | Mean RR     | -14.704 (6.82)          | -28.071 (-34.892, -21.251)          | -1.336 (-8.156, 5.485)               |
| EPA6     | BioPatch | Rest 2          | Mean RR     | -16.056 (14.131)        | -43.753 (-57.885, -29.621)          | 11.641 (-2.491, 25.772)              |
| EPA6     | BioPatch | Paced Breathing | Mean RR     | -10.495 (25.385)        | -60.25 (-85.637, -34.863)           | 39.26 (13.873, 64.647)               |
| EPA6     | BioPatch | Standing        | Mean RR     | -9.946 (21.481)         | -52.048 (-73.531, -30.566)          | 32.157 (10.675, 53.639)              |
| EPA6     | BioPatch | Rest 1          | SDNN        | -3.446 (4.405)          | -12.079 (-16.484, -7.674)           | 5.188 (0.783, 9.593)                 |
| EPA6     | BioPatch | Stressor        | SDNN        | 9.118 (51.193)          | -91.22 (-142.415, -40.024)          | 109.457 (58.261, 160.652)            |
| EPA6     | BioPatch | Rest 2          | SDNN        | -1.466 (3.741)          | -8.799 (-12.54, -5.057)             | 5.867 (2.126, 9.609)                 |
| EPA6     | BioPatch | Paced Breathing | SDNN        | -4.571 (16.113)         | -36.153 (-52.267, -20.039)          | 27.011 (10.897, 43.125)              |
| EPA6     | BioPatch | Standing        | SDNN        | -7.985 (13.05)          | -33.563 (-46.614, -20.512)          | 17.594 (4.543, 30.645)               |
| EPA6     | BioPatch | Rest 1          | Mean HR     | 1.734 (1.869)           | -1.929 (-3.798, -0.06)              | 5.398 (3.528, 7.267)                 |
| EPA6     | BioPatch | Stressor        | Mean HR     | 1.486 (0.698)           | 0.119 (-0.579, 0.817)               | 2.854 (2.156, 3.551)                 |
| EPA6     | BioPatch | Rest 2          | Mean HR     | 1.391 (1.189)           | -0.94 (-2.129, 0.249)               | 3.721 (2.532, 4.91)                  |
| EPA6     | BioPatch | Paced Breathing | Mean HR     | 0.793 (2.723)           | -4.545 (-7.268, -1.821)             | 6.131 (3.407, 8.854)                 |
| EPA6     | BioPatch | Standing        | Mean HR     | 1.079 (2.384)           | -3.594 (-5.978, -1.209)             | 5.752 (3.368, 8.137)                 |
| EPA6     | BioPatch | Rest 1          | STD HR      | -0.193 (0.503)          | -1.178 (-1.681, -0.676)             | 0.793 (0.29, 1.295)                  |
| EPA6     | BioPatch | Stressor        | STD HR      | 0.601 (3.573)           | -6.401 (-9.974, -2.829)             | 7.603 (4.03, 11.176)                 |
| EPA6     | BioPatch | Rest 2          | STD HR      | 0.049 (0.568)           | -1.064 (-1.632, -0.497)             | 1.162 (0.594, 1.729)                 |
| EPA6     | BioPatch | Paced Breathing | STD HR      | -1.163 (4.107)          | -9.213 (-13.32, -5.105)             | 6.887 (2.78, 10.994)                 |
| EPA6     | BioPatch | Standing        | STD HR      | -1.331 (3.339)          | -7.876 (-11.215, -4.536)            | 5.214 (1.875, 8.554)                 |
| EPA6     | BioPatch | Rest 1          | RMSSD       | -6.816 (7.951)          | -22.399 (-30.35, -14.448)           | 8.768 (0.817, 16.719)                |
| EPA6     | BioPatch | Stressor        | RMSSD       | 0.762 (34.162)          | -66.196 (-100.361, -32.032)         | 67.721 (33.556, 101.885)             |
| EPA6     | BioPatch | Rest 2          | RMSSD       | -3.634 (7.244)          | -17.833 (-25.077, -10.588)          | 10.564 (3.32, 17.809)                |
| EPA6     | BioPatch | Paced Breathing | RMSSD       | -5.775 (14.717)         | -34.62 (-49.337, -19.902)           | 23.07 (8.352, 37.787)                |
| EPA6     | BioPatch | Standing        | RMSSD       | -8.03 (12.319)          | -32.176 (-44.496, -19.856)          | 16.116 (3.796, 28.436)               |
| EPA6     | BioPatch | Rest 1          | LF/HF Power | 1.321 (2.363)           | -3.311 (-5.674, -0.948)             | 5.952 (3.589, 8.315)                 |
| EPA6     | BioPatch | Stressor        | LF/HF Power | 0.671 (2.097)           | -3.44 (-5.537, -1.343)              | 4.781 (2.684, 6.879)                 |



# Supplement Killian, et al., Alternative devices for heart rate variability measures

| Device 1 | Device 2           | Segment         | Measure     | Mean Difference (SD) | Lower Limit of Agreement (95%CI) | Upper Limit of Agreement (95% CI) |
|----------|--------------------|-----------------|-------------|----------------------|----------------------------------|-----------------------------------|
| EPA6     | BioPatch           | Rest 2          | LF/HF Power | 0.714 (2.216)        | -3.629 (-5.845, -1.413)          | 5.057 (2.841, 7.273)              |
| EPA6     | BioPatch           | Paced Breathing | LF/HF Power | 1.988 (5.999)        | -9.77 (-15.769, -3.771)          | 13.745 (7.746, 19.744)            |
| EPA6     | BioPatch           | Standing        | LF/HF Power | 4.451 (17.015)       | -28.899 (-45.915, -11.882)       | 37.802 (20.785, 54.818)           |
| EPA6     | HeartMath Handheld | Rest 1          | Mean RR     | -17.631 (8.811)      | -34.901 (-45.154, -24.648)       | -0.36 (-10.614, 9.893)            |
| EPA6     | HeartMath Handheld | Stressor        | Mean RR     | -18.97 (6.409)       | -31.533 (-38.991, -24.074)       | -6.407 (-13.866, 1.051)           |
| EPA6     | HeartMath Handheld | Rest 2          | Mean RR     | -17.96 (16.432)      | -50.166 (-69.286, -31.046)       | 14.246 (-4.874, 33.366)           |
| EPA6     | HeartMath Handheld | Paced Breathing | Mean RR     | -17.092 (26.588)     | -69.205 (-100.143, -38.267)      | 35.021 (4.083, 65.96)             |
| EPA6     | HeartMath Handheld | Standing        | Mean RR     | -34.346 (69.168)     | -169.914 (-255.615, -84.213)     | 101.222 (15.521, 186.923)         |
| EPA6     | HeartMath Handheld | Rest 1          | SDNN        | 1.079 (5.188)        | -9.09 (-15.126, -3.053)          | 11.247 (5.21, 17.284)             |
| EPA6     | HeartMath Handheld | Stressor        | SDNN        | 12.783 (53.783)      | -92.633 (-155.216, -30.05)       | 118.199 (55.616, 180.781)         |
| EPA6     | HeartMath Handheld | Rest 2          | SDNN        | 1.925 (5.534)        | -8.922 (-15.361, -2.483)         | 12.771 (6.332, 19.21)             |
| EPA6     | HeartMath Handheld | Paced Breathing | SDNN        | 1.125 (8.87)         | -16.26 (-26.582, -5.939)         | 18.51 (8.189, 28.831)             |
| EPA6     | HeartMath Handheld | Standing        | SDNN        | -7.487 (8.544)       | -24.234 (-34.821, -13.648)       | 9.259 (-1.327, 19.846)            |
| EPA6     | HeartMath Handheld | Rest 1          | Mean HR     | 1.465 (0.767)        | -0.038 (-0.931, 0.854)           | 2.967 (2.075, 3.86)               |
| EPA6     | HeartMath Handheld | Stressor        | Mean HR     | 1.874 (0.527)        | 0.841 (0.228, 1.454)             | 2.906 (2.293, 3.519)              |
| EPA6     | HeartMath Handheld | Rest 2          | Mean HR     | 1.519 (1.287)        | -1.004 (-2.501, 0.494)           | 4.042 (2.544, 5.54)               |
| EPA6     | HeartMath Handheld | Paced Breathing | Mean HR     | 1.534 (2.831)        | -4.014 (-7.308, -0.721)          | 7.081 (3.788, 10.375)             |
| EPA6     | HeartMath Handheld | Standing        | Mean HR     | 3.702 (7.545)        | -11.086 (-20.434, -1.738)        | 18.49 (9.142, 27.838)             |
| EPA6     | HeartMath Handheld | Rest 1          | STD HR      | 0.136 (0.437)        | -0.72 (-1.228, -0.212)           | 0.993 (0.484, 1.501)              |
| EPA6     | HeartMath Handheld | Stressor        | STD HR      | 0.756 (3.569)        | -6.238 (-10.391, -2.086)         | 7.751 (3.598, 11.904)             |
| EPA6     | HeartMath Handheld | Rest 2          | STD HR      | 0.288 (0.597)        | -0.882 (-1.576, -0.187)          | 1.458 (0.764, 2.153)              |
| EPA6     | HeartMath Handheld | Paced Breathing | STD HR      | 0.185 (1.208)        | -2.182 (-3.588, -0.777)          | 2.552 (1.146, 3.957)              |
| EPA6     | HeartMath Handheld | Standing        | STD HR      | -0.634 (0.687)       | -1.981 (-2.832, -1.129)          | 0.713 (-0.139, 1.564)             |
| EPA6     | HeartMath Handheld | Rest 1          | RMSSD       | -0.326 (9.738)       | -19.412 (-30.743, -8.081)        | 18.759 (7.429, 30.09)             |
| EPA6     | HeartMath Handheld | Stressor        | RMSSD       | -3.251 (30.798)      | -63.615 (-99.451, -27.778)       | 57.113 (21.276, 92.949)           |
| EPA6     | HeartMath Handheld | Rest 2          | RMSSD       | -0.449 (7.928)       | -15.987 (-25.212, -6.763)        | 15.089 (5.864, 24.314)            |
| EPA6     | HeartMath Handheld | Paced Breathing | RMSSD       | -4.769 (15.239)      | -34.637 (-52.368, -16.905)       | 25.098 (7.367, 42.83)             |
| EPA6     | HeartMath Handheld | Standing        | RMSSD       | -14.443 (12.028)     | -38.018 (-52.921, -23.115)       | 9.132 (-5.771, 24.035)            |
| EPA6     | HeartMath Handheld | Rest 1          | LF/HF Power | 0.575 (1.822)        | -2.995 (-5.115, -0.875)          | 4.146 (2.026, 6.266)              |
| EPA6     | HeartMath Handheld | Stressor        | LF/HF Power | 0.99 (1.524)         | -1.998 (-3.771, -0.224)          | 3.978 (2.204, 5.751)              |
| EPA6     | HeartMath Handheld | Rest 2          | LF/HF Power | 0.106 (0.939)        | -1.734 (-2.827, -0.641)          | 1.947 (0.854, 3.039)              |
| EPA6     | HeartMath Handheld | Paced Breathing | LF/HF Power | 1.704 (5.086)        | -8.265 (-14.183, -2.347)         | 11.672 (5.754, 17.59)             |
| EPA6     | HeartMath Handheld | Standing        | LF/HF Power | 7.392 (18.41)        | -28.691 (-51.501, -5.881)        | 43.475 (20.665, 66.285)           |
| EPA6     | HeartMath PC       | Rest 1          | Mean RR     | -20.648 (32.073)     | -83.511 (-118.808, -48.215)      | 42.215 (6.919, 77.511)            |
| EPA6     | HeartMath PC       | Stressor        | Mean RR     | -57.94 (88.052)      | -230.522 (-327.423, -133.622)    | 114.642 (17.742, 211.543)         |
| EPA6     | HeartMath PC       | Rest 2          | Mean RR     | -1.017 (36.408)      | -72.377 (-112.444, -32.31)       | 70.344 (30.277, 110.411)          |
| EPA6     | HeartMath PC       | Paced Breathing | Mean RR     | 13.655 (74.092)      | -131.565 (-213.102, -50.027)     | 158.875 (77.337, 240.412)         |
| EPA6     | HeartMath PC       | Standing        | Mean RR     | -40.322 (66.252)     | -170.176 (-243.086, -97.266)     | 89.533 (16.623, 162.443)          |
| EPA6     | HeartMath PC       | Rest 1          | SDNN        | -7.541 (16.933)      | -40.729 (-59.364, -22.095)       | 25.647 (7.013, 44.281)            |



# Supplement Killian, et al., Alternative devices for heart rate variability measures

| Device 1 | Device 2     | Segment         | Measure     | Mean Difference<br>(SD) | Lower Limit of Agreement<br>(95%CI) | Upper Limit of Agreement<br>(95% CI) |
|----------|--------------|-----------------|-------------|-------------------------|-------------------------------------|--------------------------------------|
| EPA6     | HeartMath PC | Stressor        | SDNN        | -3.552 (60.098)         | -121.343 (-187.48, -55.206)         | 114.239 (48.103, 180.376)            |
| EPA6     | HeartMath PC | Rest 2          | SDNN        | -12.03 (19.223)         | -49.707 (-70.862, -28.553)          | 25.646 (4.492, 46.801)               |
| EPA6     | HeartMath PC | Paced Breathing | SDNN        | -1.955 (22.306)         | -45.675 (-70.223, -21.128)          | 41.765 (17.217, 66.312)              |
| EPA6     | HeartMath PC | Standing        | SDNN        | -22.857 (20.013)        | -62.083 (-84.107, -40.058)          | 16.369 (-5.656, 38.393)              |
| EPA6     | HeartMath PC | Rest 1          | Mean HR     | 2.13 (2.705)            | -3.172 (-6.148, -0.195)             | 7.432 (4.455, 10.408)                |
| EPA6     | HeartMath PC | Stressor        | Mean HR     | 6.516 (11.552)          | -16.126 (-28.838, -3.413)           | 29.157 (16.445, 41.87)               |
| EPA6     | HeartMath PC | Rest 2          | Mean HR     | 0.389 (2.685)           | -4.874 (-7.828, -1.919)             | 5.652 (2.697, 8.607)                 |
| EPA6     | HeartMath PC | Paced Breathing | Mean HR     | -0.632 (5.366)          | -11.15 (-17.055, -5.244)            | 9.886 (3.981, 15.792)                |
| EPA6     | HeartMath PC | Standing        | Mean HR     | 4.663 (7.297)           | -9.639 (-17.669, -1.609)            | 18.964 (10.934, 26.994)              |
| EPA6     | HeartMath PC | Rest 1          | STD HR      | -0.548 (1.352)          | -3.199 (-4.687, -1.711)             | 2.102 (0.614, 3.591)                 |
| EPA6     | HeartMath PC | Stressor        | STD HR      | -0.507 (4.147)          | -8.634 (-13.197, -4.071)            | 7.621 (3.057, 12.184)                |
| EPA6     | HeartMath PC | Rest 2          | STD HR      | -0.992 (1.762)          | -4.445 (-6.383, -2.506)             | 2.461 (0.523, 4.4)                   |
| EPA6     | HeartMath PC | Paced Breathing | STD HR      | -0.652 (2.135)          | -4.836 (-7.185, -2.487)             | 3.531 (1.182, 5.88)                  |
| EPA6     | HeartMath PC | Standing        | STD HR      | -1.996 (1.743)          | -5.412 (-7.33, -3.494)              | 1.421 (-0.498, 3.339)                |
| EPA6     | HeartMath PC | Rest 1          | RMSSD       | -19.378 (27.344)        | -72.972 (-103.064, -42.881)         | 34.216 (4.124, 64.307)               |
| EPA6     | HeartMath PC | Stressor        | RMSSD       | -29.231 (49.569)        | -126.386 (-180.937, -71.836)        | 67.925 (13.374, 122.475)             |
| EPA6     | HeartMath PC | Rest 2          | RMSSD       | -30.065 (26.866)        | -82.723 (-112.29, -53.157)          | 22.593 (-6.973, 52.16)               |
| EPA6     | HeartMath PC | Paced Breathing | RMSSD       | -29.77 (29.396)         | -87.385 (-119.735, -55.036)         | 27.845 (-4.504, 60.195)              |
| EPA6     | HeartMath PC | Standing        | RMSSD       | -48.421 (30.359)        | -107.924 (-141.334, -74.514)        | 11.082 (-22.327, 44.492)             |
| EPA6     | HeartMath PC | Rest 1          | LF/HF Power | 1.877 (2.753)           | -3.518 (-6.548, -0.489)             | 7.272 (4.243, 10.301)                |
| EPA6     | HeartMath PC | Stressor        | LF/HF Power | 2.768 (3.203)           | -3.511 (-7.037, 0.014)              | 9.046 (5.521, 12.572)                |
| EPA6     | HeartMath PC | Rest 2          | LF/HF Power | 1.484 (1.633)           | -1.717 (-3.514, 0.08)               | 4.685 (2.888, 6.483)                 |
| EPA6     | HeartMath PC | Paced Breathing | LF/HF Power | 6.028 (5.363)           | -4.483 (-10.385, 1.419)             | 16.54 (10.638, 22.441)               |
| EPA6     | HeartMath PC | Standing        | LF/HF Power | 8.278 (12.387)          | -16.001 (-29.633, -2.369)           | 32.557 (18.925, 46.189)              |
